# Supplementary material
Source: PubMed Central journal article supplement (PMC10066865)
Supplement: NIHMS1880158-supplement-Supplementary_Data.pdf [file NIHMS1880158-supplement-Supplementary_Data.pdf]

## Supplemental Figures

**A.**

| Variable                          | PC 1   | PC 2   | PC 3   | PC 4   |
|-----------------------------------|--------|--------|--------|--------|
| PPAR $\gamma$ + macrophages (IHC) | 5.109  | 1.234  | -0.352 | -0.052 |
| TNF (peri-infarct, U-PLEX)        | 0.921  | -1.648 | 0.841  | 0.015  |
| IL-10 (core, Western blot)        | 0.598  | 0.213  | 0.025  | 0.187  |
| MiP-1b (peri-infarct, U-PLEX)     | 0.245  | -0.212 | 0.653  | -0.107 |
| MCP-1 (peri-infarct, U-PLEX)      | 0.121  | 0.094  | 0.202  | 0.133  |
| MIP-1a (peri-infarct, U-PLEX)     | -0.040 | -0.152 | 0.385  | -0.122 |
| IL-6 (core, U-PLEX)               | -0.275 | -0.519 | 0.063  | -0.037 |
| MCP-1 (core, U-PLEX)              | -0.283 | -0.056 | 0.033  | 0.112  |
| TNF (core, U-PLEX)                | -0.296 | -0.707 | -0.468 | 0.067  |
| IL-6 (peri-infarct, U-PLEX)       | -0.590 | -0.374 | 0.159  | -0.063 |
| IL-4 (peri-infarct, U-PLEX)       | -0.999 | -0.123 | -0.641 | -0.053 |
| MiP-1b (core, U-PLEX)             | -1.003 | -0.111 | -0.685 | -0.006 |
| MIP-1a (core, U-PLEX)             | -1.144 | -0.097 | -0.834 | -0.070 |
| IL-4 (core, U-PLEX)               | -2.365 | 2.458  | 0.618  | -0.003 |
| Explained variance (%)            | 70.9   | 21.8   | 7.0    | 0.2    |
| Cumulative variance explained (%) | 70.9   | 92.8   | 99.8   | 100.0  |

**B.**

|                | Component |        |        |        |
|----------------|-----------|--------|--------|--------|
|                | 1         | 2      | 3      | 4      |
| CS-A + NPC     | 0.542     | 0.403  | -0.267 | 0.687  |
| NPC            | 0.520     | -0.215 | 0.826  | 0.037  |
| CS-A           | 0.559     | 0.329  | -0.234 | -0.724 |
| Stroke Control | 0.351     | -0.827 | -0.438 | 0.037  |

**C.**

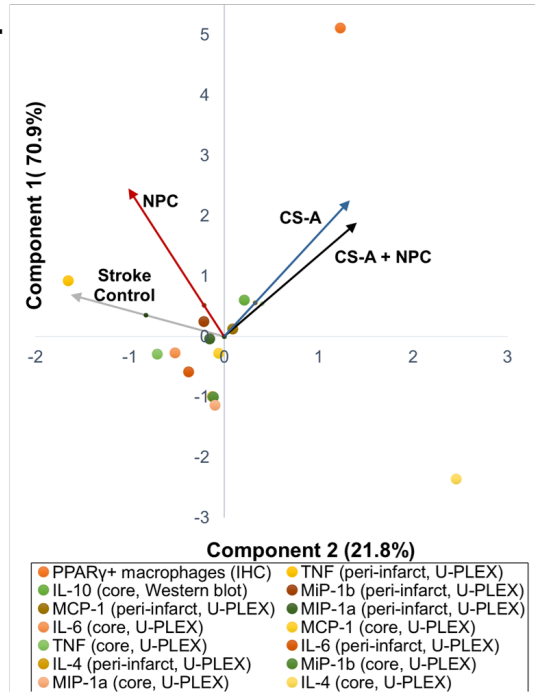

**Supplemental Figure 1. Principal component analysis (PCA) of biochemical markers identifies PPAR $\gamma$ + macrophages and IL-4 as key features. A.** Principal component analysis. **B.** Coefficients of the principal components by treatment group. **C.** Joint PCA and correlation biplot (92.8 variance explained).

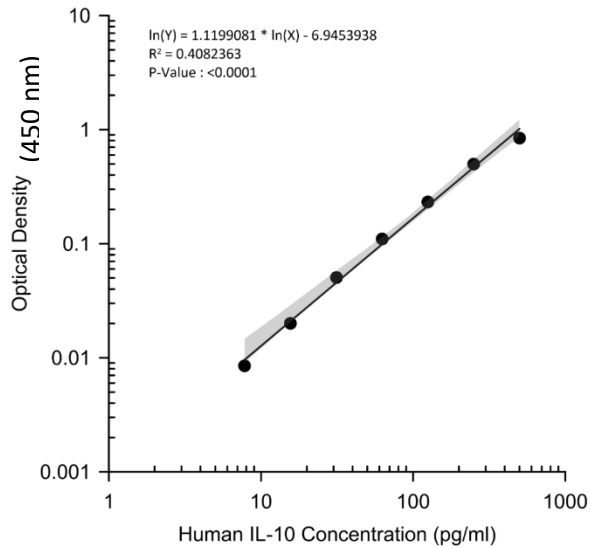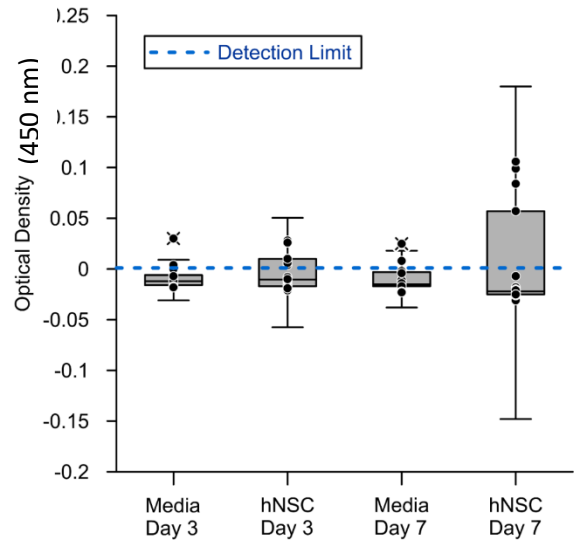

### IL-10 Standard Graph

### O.D Values for Treatments

**Supplemental Figure 2. Human neural stem cells are not a significant source of IL-10.** (A) IL-10 standard curve; and (B) IL-10 protein levels measured by ELISA in media only controls and in media from human NSCs following 3 and 7 days of culture *in vitro*. Error bars represent 95% CI. One-way ANOVA.
